# Supplementary material
Source: PubMed Central journal article supplement (PMC3386873)
Supplement: 1203394109_sapp.pdf [file 1203394109_sapp.pdf]

**Table S1.** ANOVA results for MT immunolabeling. Unless otherwise noted (for cell counts), data are shown as optical density measures, corrected for background.

| Area                             | Field Sparrow (spring) | Field Sparrow (winter) | Song Sparrow (spring) | Song Sparrow (winter) | Species <i>P</i> | Season <i>P</i>   | Species*Season <i>P</i> |
|----------------------------------|------------------------|------------------------|-----------------------|-----------------------|------------------|-------------------|-------------------------|
| <b><i>POA-hypothalamus:</i></b>  |                        |                        |                       |                       |                  |                   |                         |
| POM                              | 477.8 ± 132.6          | 487.3 ± 117.7          | 387.0 ± 92.4          | 325.0 ± 39.3          | 0.2285           | 0.7993            | 0.7293                  |
| PVN                              | 628.0 ± 226.8          | 650.6 ± 249.2          | 452.0 ± 171.8         | 471.3 ± 103.7         | 0.3759           | 0.9161            | 0.9935                  |
| PVN cells per section/g bw*      | 13.9 ± 2.0             | 11.6 ± 1.6             | 7.5 ± 0.9             | 6.8 ± 0.5             | <b>0.0006</b>    | 0.2870            | 0.5751                  |
| AH                               | 561.2 ± 191.3          | 472.2 ± 102.7          | 310.2 ± 51.2          | 267.5 ± 21.5          | 0.0555           | 0.5631            | 0.8387                  |
| VMH, medial                      | 229.6 ± 27.2           | 281.8 ± 64.9           | 179.5 ± 33.4          | 242.4 ± 23.3          | 0.2839           | 0.1724            | 0.8964                  |
| VMH, lateral                     | 235.9 ± 28.2           | 248.0 ± 71.2           | 181.9 ± 31.9          | 232.3 ± 21.7          | 0.4266           | 0.4747            | 0.6605                  |
| <b><i>Septum:</i></b>            |                        |                        |                       |                       |                  |                   |                         |
| LSc.d (pallial), rostral*        | 129.9 ± 10.6           | 280.9 ± 40.7           | 155.0 ± 34.9          | 184.9 ± 15.7          | 0.2270           | <b>0.0047</b>     | <b>0.0458</b>           |
| subpallial LSc, rostral          | 93.9 ± 14.5            | 155.2 ± 15.8           | 112.6 ± 23.9          | 105.0 ± 12.5          | 0.3715           | 0.1343            | 0.0592                  |
| LSr                              | 281.4 ± 30.4           | 541.5 ± 66.8           | 353.9 ± 79.6          | 400.0 ± 33.4          | 0.5490           | <b>0.0137</b>     | 0.0735                  |
| LSc.d (pallial), caudal          | 117.5 ± 35.7           | 206.4 ± 45.7           | 151.1 ± 34.6          | 227.9 ± 28.7          | 0.4619           | <b>0.0353</b>     | 0.8717                  |
| subpallial LSc, caudal           | 196.1 ± 22.2           | 210.5 ± 28.8           | 223.4 ± 23.0          | 236.5 ± 25.1          | 0.2980           | 0.5866            | 0.9802                  |
| nPC                              | 194.0 ± 24.7           | 222.4 ± 21.7           | 173.6 ± 15.8          | 203.9 ± 65.2          | 0.6090           | 0.4414            | 0.9800                  |
| CcS                              | 183.5 ± 49.3           | 99.1 ± 35.5            | 112.0 ± 38.4          | 113.3 ± 47.3          | 0.5130           | 0.3461            | 0.3311                  |
| <b><i>Extended amygdala:</i></b> |                        |                        |                       |                       |                  |                   |                         |
| MeA, anterior*                   | 35.5 ± 3.9             | 81.4 ± 5.8             | 35.6 ± 3.4            | 37.4 ± 4.8            | <b>0.0001</b>    | <b>&lt;0.0001</b> | <b>0.0001</b>           |
| MeA, posterior*                  | 37.7 ± 3.7             | 83.8 ± 13.4            | 41.9 ± 4.8            | 50.3 ± 2.7            | 0.0638           | <b>0.0016</b>     | <b>0.0204</b>           |
| BSTm                             | 31.1 ± 3.4             | 30.0 ± 1.3             | 24.8 ± 2.2            | 25.0 ± 2.6            | <b>0.0343</b>    | 0.8517            | 0.8135                  |
| BSTL                             | 58.1 ± 6.7             | 68.4 ± 3.9             | 58.8 ± 7.1            | 68.0 ± 3.0            | 0.9769           | 0.0877            | 0.9200                  |
| <b><i>Midbrain:</i></b>          |                        |                        |                       |                       |                  |                   |                         |
| CG                               | 148.4 ± 15.4           | 175.3 ± 26.4           | 126.0 ± 14.8          | 196.0 ± 19.0          | 0.9637           | <b>0.0217</b>     | 0.2812                  |
| ICo                              | 154.9 ± 13.9           | 151.6 ± 16.5           | 134.0 ± 12.9          | 195.8 ± 20.8          | 0.5264           | 0.1234            | 0.0888                  |
| VTA, rostral                     | 140.8 ± 20.5           | 122.5 ± 26.4           | 178.2 ± 79.2          | 137.4 ± 22.3          | 0.5626           | 0.5138            | 0.8021                  |
| VTA, caudal                      | 115.6 ± 17.7           | 84.6 ± 10.6            | 62.2 ± 13.7           | 106.5 ± 13.4          | 0.2758           | 0.6419            | <b>0.0147</b>           |
| <b><i>Other:</i></b>             |                        |                        |                       |                       |                  |                   |                         |
| nAcc                             | 138.4 ± 21.9           | 164.4 ± 33.0           | 305.5 ± 105.5         | 158.9 ± 23.3          | 0.1754           | 0.3074            | 0.1493                  |

\*Areas marked with an asterisk yield significant models following Benjamini-Hochberg corrections ( $\alpha = 0.0091$ ).

**Table S2.** ANOVA results for CRH immunolabeling. Unless otherwise noted (for cell counts), data are shown as optical density measures, corrected for background.

| Area                                      | Field Sparrow (spring) | Field Sparrow (winter) | Song Sparrow (spring) | Song Sparrow (winter) | Species <i>P</i> | Season <i>P</i>   | Species*Season <i>P</i> |
|-------------------------------------------|------------------------|------------------------|-----------------------|-----------------------|------------------|-------------------|-------------------------|
| <b><i>POA-hypothalamus:</i></b>           |                        |                        |                       |                       |                  |                   |                         |
| POM*                                      | 820.0 ± 193.1          | 349.8 ± 50.6           | 543.4 ± 80.2          | 268.1 ± 36.6          | 0.1162           | <b>0.0027</b>     | 0.3820                  |
| PVN*                                      | 846.4 ± 85.7           | 437.4 ± 48.4           | 772.2 ± 84.9          | 343.6 ± 42.0          | 0.2331           | <b>&lt;0.0001</b> | 0.8876                  |
| PVN cells per section/g bw (commissural)* | 2.5 ± 0.5              | 2.2 ± 0.2              | 2.0 ± 0.4             | 1.2 ± 0.3             | 0.0696           | 0.1428            | 0.5427                  |
| AH*                                       | 552.1 ± 102.3          | 225.7 ± 47.1           | 374.4 ± 52.9          | 207.9 ± 35.4          | 0.1467           | <b>0.0110</b>     | 0.2311                  |
| VMH, medial*                              | 258.2 ± 55.2           | 215.1 ± 49.9           | 68.2 ± 8.6            | 43.7 ± 7.4            | <b>0.0001</b>    | 0.3797            | 0.8064                  |
| VMH, lateral*                             | 56.4 ± 11.6            | 47.8 ± 4.4             | 29.8 ± 6.4            | 20.1 ± 5.7            | <b>0.0018</b>    | 0.2355            | 0.9425                  |
| <b><i>Septum:</i></b>                     |                        |                        |                       |                       |                  |                   |                         |
| LSc.d (pallial), rostral*                 | 102.1 ± 17.3           | 259.9 ± 33.3           | 193.0 ± 45.0          | 200.0 ± 21.1          | 0.6242           | <b>0.0156</b>     | <b>0.0252</b>           |
| subpallial LSc, rostral                   | 168.0 ± 25.9           | 190.3 ± 25.9           | 198.7 ± 35.4          | 133.6 ± 18.1          | 0.6370           | 0.4384            | 0.1217                  |
| LSr*                                      | 145.6 ± 16.4           | 279.7 ± 21.9           | 250.7 ± 61.9          | 214.0 ± 19.2          | 0.5817           | 0.1813            | <b>0.0248</b>           |
| LSc.d (pallial), caudal                   | 148.7 ± 30.7           | 244.3 ± 80.7           | 164.6 ± 44.0          | 191.1 ± 22.3          | 0.7154           | 0.2438            | 0.5034                  |
| subpallial LSc, caudal*                   | 331.6 ± 21.3           | 310.7 ± 42.7           | 286.9 ± 28.3          | 227.2 ± 14.3          | <b>0.0454</b>    | 0.1927            | 0.5221                  |
| nPC*                                      | 596.2 ± 105.6          | 444.9 ± 37.0           | 397.1 ± 61.5          | 291.9 ± 24.5          | <b>0.0135</b>    | 0.0623            | 0.7267                  |
| CcS*                                      | 491.4 ± 103.2          | 266.5 ± 52.2           | 209.5 ± 32.9          | 147.2 ± 16.2          | <b>0.0035</b>    | <b>0.0281</b>     | 0.1954                  |
| <b><i>Extended amygdala:</i></b>          |                        |                        |                       |                       |                  |                   |                         |
| MeA, anterior*                            | 212.4 ± 22.4           | 297.9 ± 43.7           | 220.3 ± 49.2          | 76.9 ± 9.9            | <b>0.0065</b>    | 0.4184            | <b>0.0039</b>           |
| MeA, posterior*                           | 323.0 ± 26.0           | 421.9 ± 29.5           | 452.6 ± 46.9          | 199.6 ± 9.2           | 0.1496           | <b>0.0217</b>     | <b>&lt;0.0001</b>       |
| BSTm*                                     | 159.6 ± 23.9           | 70.5 ± 9.0             | 106.4 ± 12.7          | 58.6 ± 7.1            | <b>0.0386</b>    | <b>0.0002</b>     | 0.1762                  |
| BSTL*                                     | 469.9 ± 47.1           | 617.8 ± 61.1           | 546.5 ± 57.3          | 439.9 ± 41.37         | 0.3445           | 0.6976            | <b>0.0245</b>           |
| <b><i>Midbrain:</i></b>                   |                        |                        |                       |                       |                  |                   |                         |
| CG*                                       | 493.8 ± 73.6           | 375.8 ± 60.5           | 505.8 ± 40.4          | 276.9 ± 18.6          | 0.4186           | <b>0.0036</b>     | 0.3039                  |
| ICo*                                      | 559.7 ± 31.2           | 392.7 ± 27.7           | 517.2 ± 69.1          | 348.0 ± 16.1          | 0.3015           | <b>0.0006</b>     | 0.9796                  |
| VTA, rostral*                             | 889.0 ± 53.1           | 485.7 ± 57.7           | 1003.9 ± 250.0        | 443.9 ± 46.0          | 0.5742           | <b>0.0049</b>     | 0.3934                  |
| VTA, caudal*                              | 637.2 ± 85.0           | 470.6 ± 46.0           | 637.5 ± 82.2          | 231.4 ± 65.7          | 0.1101           | <b>0.0007</b>     | 0.1092                  |
| <b><i>Other:</i></b>                      |                        |                        |                       |                       |                  |                   |                         |
| nAcc*                                     | 163.7 ± 19.0           | 175.2 ± 34.0           | 464.9 ± 61.3          | 390.4 ± 85.5          | <b>0.0002</b>    | 0.5802            | 0.4521                  |

\*Areas marked with an asterisk yield significant models following Benjamini-Hochberg corrections ( $\alpha = 0.0454$ ).

**Table S3.** ANOVA results for TH immunolabeling. Unless otherwise noted (for cell counts), data are shown as optical density measures, corrected for background.

| Area                                          | Field Sparrow (spring) | Field Sparrow (winter) | Song Sparrow (spring) | Song Sparrow (winter) | Species P         | Season P      | Species*Season P |
|-----------------------------------------------|------------------------|------------------------|-----------------------|-----------------------|-------------------|---------------|------------------|
| <b><i>POA-hypothalamus:</i></b>               |                        |                        |                       |                       |                   |               |                  |
| POM*                                          | 173.5 ± 17.6           | 134.1 ± 9.5            | 125.9 ± 6.6           | 94.7 ± 23.3           | <b>0.0156</b>     | <b>0.0439</b> | 0.8031           |
| PVN*                                          | 462.4 ± 84.6           | 242.1 ± 23.1           | 271.2 ± 43.4          | 142.7 ± 28.5          | <b>0.0067</b>     | <b>0.0017</b> | 0.3463           |
| A14 cells per section/g bw (SPa)*             | 1.1 ± 0.2              | 0.8 ± 0.1              | 0.3 ± 0.1             | 0.1 ± 0.0             | <b>&lt;0.0001</b> | <b>0.0668</b> | 0.6544           |
| AH                                            | 144.6 ± 12.7           | 199.0 ± 11.6           | 113.6 ± 5.4           | 108.3 ± 18.4          | 0.1417            | 0.2705        | 0.4650           |
| VMH, medial                                   | 106.4 ± 39.2           | 104.9 ± 24.1           | 94.9 ± 11.4           | 78.5 ± 14.3           | 0.3105            | 0.6281        | 0.6858           |
| VMH, lateral                                  | 108.4 ± 14.5           | 106.5 ± 23.5           | 102.2 ± 11.9          | 76. ± 13.9            | 0.3146            | 0.4429        | 0.5084           |
| TH A12/g bw (ExM)*                            | 2.4 ± 0.7              | 2.9 ± 0.4              | 1.3 ± 0.3             | 0.6 ± 0.1             | <b>0.0008</b>     | 0.8051        | 0.1708           |
| <b><i>Septum:</i></b>                         |                        |                        |                       |                       |                   |               |                  |
| LSc.d (pallial), rostral                      | 396.9 ± 83.5           | 324.3 ± 71.9           | 246.4 ± 21.0          | 199.9 ± 37.3          | <b>0.0323</b>     | 0.3285        | 0.8287           |
| subpallial LSc, rostral*                      | 418.0 ± 45.5           | 281.9 ± 32.8           | 322.7 ± 47.7          | 165.9 ± 29.8          | <b>0.0134</b>     | <b>0.0013</b> | 0.7915           |
| LSr*                                          | 776.9 ± 128.6          | 606.0 ± 91.5           | 494.2 ± 52.8          | 285.4 ± 43.3          | <b>0.0021</b>     | <b>0.0366</b> | 0.8242           |
| LSc.d (pallial), caudal                       | 148.5 ± 75.6           | 69.6 ± 15.7            | 94.1 ± 22.5           | 167.4 ± 54.8          | 0.6533            | 0.9531        | 0.1266           |
| subpallial LSc, caudal*                       | 1075.9 ± 177.1         | 704.3 ± 46.2           | 630.2 ± 34.3          | 538.1 ± 139.5         | <b>0.0160</b>     | 0.0590        | 0.2401           |
| nPC                                           | 132.4 ± 48.6           | 106.0 ± 15.8           | 145.6 ± 9.2           | 158.1 ± 48.0          | 0.3740            | 0.8488        | 0.5944           |
| CcS                                           | 314.2 ± 76.5           | 350.7 ± 48.1           | 297.3 ± 35.5          | 256.5 ± 48.4          | 0.3137            | 0.9684        | 0.4797           |
| <b><i>Extended amygdala:</i></b>              |                        |                        |                       |                       |                   |               |                  |
| MeA, anterior                                 | 278.7 ± 37.0           | 291.0 ± 20.3           | 280.1 ± 22.1          | 220.6 ± 30.7          | 0.2359            | 0.4124        | 0.2186           |
| MeA, posterior*                               | 139.6 ± 3.6            | 187.0 ± 32.4           | 137.6 ± 10.3          | 277.5 ± 49.4          | 0.1970            | <b>0.0110</b> | 0.1786           |
| BSTm                                          | 140.7 ± 38.5           | 196.4 ± 21.9           | 233.3 ± 27.6          | 184.2 ± 50.6          | 0.2946            | 0.9292        | 0.1764           |
| BSTL                                          | 219.9 ± 37.2           | 399.9 ± 51.3           | 363.8 ± 54.4          | 337.5 ± 65.3          | 0.4661            | 0.1773        | 0.0757           |
| <b><i>Midbrain:</i></b>                       |                        |                        |                       |                       |                   |               |                  |
| CG*                                           | 279.1 ± 33.4           | 172.3 ± 10.8           | 216.1 ± 24.4          | 191.3 ± 27.2          | 0.3852            | <b>0.0158</b> | 0.1138           |
| A11 cells per section/g bw (CG)*              | 11.0 ± 1.2             | 9.1 ± 1.5              | 12.1 ± 1.3            | 4.8 ± 2.2             | 0.3462            | <b>0.0130</b> | 0.1224           |
| ICo                                           | 127.6 ± 8.9            | 122.7 ± 19.5           | 92.9 ± 5.0            | 126.8 ± 12.7          | 0.2756            | 0.3008        | 0.1712           |
| VTA, rostral*                                 | 806.9 ± 58.9           | 615.8 ± 70.2           | 502.9 ± 97.0          | 415.6 ± 53.1          | <b>0.0022</b>     | 0.0644        | 0.4719           |
| A10r cells/100 μm <sup>2</sup> (rostral VTA)* | 32.0 ± 0.8             | 31.2 ± 2.7             | 18.1 ± 1.6            | 17.3 ± 1.9            | <b>&lt;0.0001</b> | 0.6802        | 0.9851           |
| VTA, caudal*                                  | 518.2 ± 55.6           | 416.4 ± 27.2           | 396.6 ± 37.9          | 290.4 ± 66.7          | <b>0.0236</b>     | 0.0524        | 0.9665           |
| A10c cells/100 μm <sup>2</sup> (caudal VTA)*  | 20.3 ± 1.7             | 21.5 ± 2.6             | 14.3 ± 1.6            | 12.0 ± 4.1            | <b>0.0151</b>     | 0.8522        | 0.5547           |
| <b><i>Other:</i></b>                          |                        |                        |                       |                       |                   |               |                  |
| nAcc*                                         | 485.9 ± 40.1           | 401.00 ± 55.0          | 470.5 ± 9.3           | 324.3 ± 56.1          | 0.3426            | <b>0.0249</b> | 0.5241           |

\*Areas marked with an asterisk yield significant models following Benjamini-Hochberg corrections ( $\alpha = 0.0288$ ).

**Table S4.** ANOVA results for VT immunolabeling. Unless otherwise noted (for cell counts), data are shown as optical density measures, corrected for background.

| Area                             | Field Sparrow (spring) | Field Sparrow (winter) | Song Sparrow (spring) | Song Sparrow (winter) | Species P     | Season P          | Species*Season P |
|----------------------------------|------------------------|------------------------|-----------------------|-----------------------|---------------|-------------------|------------------|
| <b><i>POA-hypothalamus:</i></b>  |                        |                        |                       |                       |               |                   |                  |
| POM*                             | 461.4 ± 37.9           | 169.2 ± 37.2           | 449.5 ± 34.0          | 116.8 ± 23.1          | 0.3486        | <b>&lt;0.0001</b> | 0.5536           |
| PVN*                             | 1059.3 ± 120.0         | 802.7 ± 191.4          | 1149.6 ± 86.2         | 227.6 ± 61.1          | 0.0661        | <b>0.0001</b>     | <b>0.0148</b>    |
| PVN cells per section/g bw*      | 4.4 ± 0.6              | 4.0 ± 0.6              | 3.7 ± 0.3             | 1.0 ± 0.2             | <b>0.0012</b> | <b>0.0051</b>     | <b>0.0285</b>    |
| AH*                              | 321.6 ± 43.3           | 152.9 ± 27.8           | 299.3 ± 28.6          | 107.0 ± 23.3          | 0.2939        | <b>&lt;0.0001</b> | 0.7142           |
| VMH, medial*                     | 76.5 ± 6.0             | 51.8 ± 10.3            | 59.4 ± 6.5            | 44.4 ± 11.0           | 0.1753        | <b>0.0348</b>     | 0.5859           |
| VMH, lateral*                    | 100.6 ± 7.5            | 47.8 ± 8.7             | 59.6 ± 6.5            | 41.9 ± 10.7           | <b>0.0119</b> | <b>0.0005</b>     | 0.0514           |
| <b><i>Septum:</i></b>            |                        |                        |                       |                       |               |                   |                  |
| subpallial LSc, rostral*         | 70.6 ± 8.6             | 60.5 ± 8.9             | 114.9 ± 19.7          | 73.3 ± 5.5            | <b>0.0268</b> | <b>0.0430</b>     | 0.2029           |
| LSc.d (pallial), caudal          | 101.2 ± 13.6           | 117.5 ± 15.9           | 108.8 ± 11.5          | 101.0 ± 11.2          | 0.7416        | 0.7487            | 0.3713           |
| subpallial LSc, caudal*          | 154.4 ± 12.8           | 117.6 ± 11.9           | 203.4 ± 16.2          | 117.4 ± 8.4           | 0.0684        | <b>&lt;0.0001</b> | 0.0656           |
| nPC*                             | 138.0 ± 24.2           | 103.8 ± 10.4           | 139.4 ± 17.5          | 86.8 ± 10.8           | 0.6434        | <b>0.0170</b>     | 0.5884           |
| CcS*                             | 610.9 ± 126.6          | 83.9 ± 12.8            | 542.4 ± 53.2          | 72.8 ± 12.3           | 0.5717        | <b>&lt;0.0001</b> | 0.6827           |
| <b><i>Extended amygdala:</i></b> |                        |                        |                       |                       |               |                   |                  |
| MeA, anterior                    | 95.4 ± 18.1            | 57.1 ± 13.0            | 101.5 ± 13.2          | 90.2 ± 7.4            | 0.1613        | 0.0808            | 0.3289           |
| MeA, posterior                   | 147.7 ± 8.1            | 132.5 ± 11.8           | 143.0 ± 8.5           | 129.1 ± 12.1          | 0.6941        | 0.1717            | 0.9517           |
| BSTm*                            | 296.3 ± 80.2           | 36.6 ± 6.5             | 188.8 ± 0.14.8        | 30.7 ± 7.5            | <b>0.0064</b> | <b>&lt;0.0001</b> | <b>0.0130</b>    |
| BSTL*                            | 72.0 ± 0.6             | 70.6 ± 3.6             | 86.5 ± 14.6           | 84.3 ± 6.6            | <b>0.0005</b> | 0.6057            | 0.9100           |
| <b><i>Midbrain:</i></b>          |                        |                        |                       |                       |               |                   |                  |
| CG*                              | 294.8 ± 45.3           | 144.0 ± 22.8           | 183.4 ± 7.3           | 106.5 ± 6.3           | <b>0.0092</b> | <b>0.0003</b>     | 0.1677           |
| ICo*                             | 401.5 ± 114.4          | 193.9 ± 18.2           | 288.9 ± 23.14         | 183.7 ± 21.8          | 0.0519        | <b>&lt;0.0001</b> | 0.0998           |
| VTA, rostral*                    | 234.8 ± 32.3           | 132.0 ± 13.6           | 238.1 ± 15.8          | 108.3 ± 13.9          | 0.6258        | <b>&lt;0.0001</b> | 0.5152           |
| VTA, caudal*                     | 283.0 ± 29.9           | 142.3 ± 14.9           | 271.4 ± 25.3          | 120.2 ± 21.8          | 0.4839        | <b>&lt;0.0001</b> | 0.8279           |
| <b><i>Other:</i></b>             |                        |                        |                       |                       |               |                   |                  |
| nAcc*                            | 164.7 ± 17.9           | 123.1 ± 55.5           | 110.4 ± 6.8           | 59.7 ± 4.3            | <b>0.0323</b> | <b>0.0025</b>     | 0.9094           |

\*Areas marked with an asterisk yield significant models following Benjamini-Hochberg corrections ( $\alpha = 0.0475$ ).

**Table S5.** ANOVA results for VIP immunolabeling. Unless otherwise noted (for cell counts), data are shown as optical density measures, corrected for background.

| Area                                              | Field Sparrow (spring) | Field Sparrow (winter) | Song Sparrow (spring) | Song Sparrow (winter) | Species <i>P</i>  | Season <i>P</i>   | Species*Season <i>P</i> |
|---------------------------------------------------|------------------------|------------------------|-----------------------|-----------------------|-------------------|-------------------|-------------------------|
| <b><i>POA-hypothalamus:</i></b>                   |                        |                        |                       |                       |                   |                   |                         |
| POM*                                              | 119.7 ± 13.6           | 103.5 ± 24.7           | 139.7 ± 17.1          | 52.9 ± 11.1           | 0.3897            | <b>0.0076</b>     | 0.0559                  |
| PVN*                                              | 187.0 ± 21.4           | 132.8 ± 25.9           | 258.2 ± 24.2          | 76.8 ± 17.1           | 0.7398            | <b>&lt;0.0001</b> | <b>0.0102</b>           |
| AH*                                               | 117.6 ± 12.9           | 120.5 ± 21.2           | 161.0 ± 12.4          | 60.8 ± 12.5           | 0.5977            | <b>0.0046</b>     | <b>0.0029</b>           |
| VMH, medial*                                      | 84.635 ± 10.0          | 65.9 ± 12.4            | 29.6 ± 3.6            | 29.3 ± 9.1            | <b>&lt;0.0001</b> | 0.3359            | 0.3196                  |
| VMH, lateral*                                     | 56.1 ± 5.1             | 41.5 ± 11.5            | 26.4 ± 3.7            | 22.3 ± 6.3            | <b>0.0031</b>     | 0.2105            | 0.4737                  |
| Tuberal cells per section/g bw (periventricular)* | 1.0 ± 0.2              | 0.0 ± 0.0              | 2.1 ± 0.3             | 0.0 ± 0.0             | <b>0.0044</b>     | <b>&lt;0.0001</b> | <b>0.0062</b>           |
| <b><i>Septum:</i></b>                             |                        |                        |                       |                       |                   |                   |                         |
| LSc.d (pallial), rostral                          | 54.1 ± 13.6            | 46.5 ± 24.1            | 61.0 ± 11.4           | 69.0 ± 2.2            | 0.1645            | 0.9821            | 0.4531                  |
| subpallial LSc, rostral*                          | 137.9 ± 12.0           | 118.6 ± 12.9           | 179.4 ± 22.9          | 87.33 ± 26.4          | 0.7446            | <b>0.0018</b>     | <b>0.0287</b>           |
| LSr                                               | 64.3 ± 12.5            | 77.7 ± 17.5            | 79.0 ± 11.1           | 72.5 ± 3.3            | 0.7016            | 0.7779            | 0.4262                  |
| LSc.d (pallial), caudal                           | 105.9 ± 10.6           | 104.6 ± 12.6           | 128.9 ± 16.3          | 93.8 ± 7.7            | 0.6237            | 0.1513            | 0.1810                  |
| subpallial LSc, caudal                            | 212.0 ± 53.1           | 166.7 ± 15.6           | 175.4 ± 21.5          | 139.5 ± 9.9           | 0.0890            | <b>0.0340</b>     | 0.7925                  |
| nPC                                               | 68.3 ± 16.4            | 36.9 ± 10.3            | 74.4 ± 14.0           | 57.1 ± 7.9            | 0.3104            | 0.0675            | 0.5829                  |
| CcS*                                              | 176.9 ± 10.9           | 140.5 ± 15.3           | 255.5 ± 15.5          | 56.5 ± 6.1            | 0.8328            | <b>&lt;0.0001</b> | <b>&lt;0.0001</b>       |
| <b><i>Extended amygdala:</i></b>                  |                        |                        |                       |                       |                   |                   |                         |
| MeA, anterior*                                    | 61.7 ± 5.0             | 43.3 ± 4.1             | 95.7 ± 6.8            | 95.2 ± 4.1            | <b>&lt;0.0001</b> | 0.0807            | 0.0964                  |
| MeA, posterior*                                   | 71.5 ± 3.9             | 52.3 ± 5.8             | 73.5 ± 5.0            | 79.0 ± 8.6            | <b>0.0286</b>     | 0.2740            | 0.0556                  |
| BSTm*                                             | 83.4 ± 6.2             | 64.0 ± 6.7             | 81.5 ± 9.3            | 32.8 ± 3.2            | <b>0.0229</b>     | <b>&lt;0.0001</b> | <b>0.0407</b>           |
| BSTL                                              | 150.22 ± 15.4          | 150.8 ± 9.4            | 181.4 ± 20.5          | 173.3 ± 16.3          | 0.1074            | 0.8155            | 0.7867                  |
| <b><i>Midbrain:</i></b>                           |                        |                        |                       |                       |                   |                   |                         |
| CG*                                               | 90.3 ± 5.1             | 84.2 ± 5.6             | 78.6 ± 3.1            | 60.0 ± 5.0            | <b>0.0013</b>     | <b>0.0180</b>     | 0.2094                  |
| ICo*                                              | 143.9 ± 12.9           | 111.8 ± 6.4            | 103.8 ± 5.4           | 104.5 ± 10.9          | <b>0.0206</b>     | 0.1127            | 0.0971                  |
| VTA, rostral                                      | 114.2 ± 26.5           | 61.3 ± 11.9            | 90.9 ± 12.8           | 74.0 ± 16.6           | 0.7714            | 0.0662            | 0.3282                  |
| VTA, caudal*                                      | 94.5 ± 14.2            | 66.3 ± 2.7             | 108.5 ± 6.1           | 70.8 ± 11.9           | 0.3604            | <b>0.0032</b>     | 0.6360                  |
| <b><i>Other:</i></b>                              |                        |                        |                       |                       |                   |                   |                         |
| nAcc*                                             | 187.2 ± 17.7           | 157.8 ± 22.5           | 238.5 ± 33.6          | 114.3 ± 14.9          | 0.8672            | <b>0.0036</b>     | 0.0557                  |

\*Areas marked with an asterisk yield significant models following Benjamini-Hochberg corrections ( $\alpha = 0.0318$ ).

**Table S6.** ANOVA results for optical density of ARO, corrected for background, in major sites of ARO production.

| Area                             | Field Sparrow (spring) | Field Sparrow (winter) | Song Sparrow (spring) | Song Sparrow (winter) | Species <i>P</i> | Season <i>P</i>   | Species*Season <i>P</i> |
|----------------------------------|------------------------|------------------------|-----------------------|-----------------------|------------------|-------------------|-------------------------|
| <b><i>POA-hypothalamus:</i></b>  |                        |                        |                       |                       |                  |                   |                         |
| VMH, lateral*                    | 447.5 ± 76.8           | 596.0 ± 23.5           | 441.2 ± 39.0          | 523.2 ± 41.4          | 0.4316           | <b>0.0297</b>     | 0.5072                  |
| <b><i>Septum:</i></b>            |                        |                        |                       |                       |                  |                   |                         |
| nPC                              | 265.0 ± 43.7           | 264.1 ± 17.0           | 219.4 ± 25.2          | 219.4 ± 25.2          | 0.6187           | 0.3327            | 0.3183                  |
| <b><i>Extended amygdala:</i></b> |                        |                        |                       |                       |                  |                   |                         |
| MeA, anterior*                   | 116.6 ± 14.0           | 186.4 ± 25.5           | 190.3 ± 41.5          | 89.6 ± 13.2           | 0.6641           | 0.5629            | <b>0.0040</b>           |
| MeA, posterior*                  | 175.5 ± 7.3            | 219.9 ± 44.5           | 252.9 ± 25.4          | 286.0 ± 31.5          | <b>0.0282</b>    | 0.2157            | 0.8537                  |
| BSTm*                            | 97.4 ± 8.7             | 68.8 ± 8.6             | 93.4 ± 3.7            | 53.1 ± 4.2            | 0.1584           | <b>&lt;0.0001</b> | 0.3933                  |

\*Areas marked with an asterisk yield significant models following Benjamini-Hochberg corrections ( $\alpha = 0.0400$ ).

**Table S7.** Results of simple regressions between MT immunolabeling and measures of aggression (average response latency for field sparrows and aggression PC1 for song sparrows). Both aggression indices are negatively related to aggression. Unless otherwise noted (for cell counts), data are shown as optical density measures, corrected for background.

| Area                       | Field Sparrow mean latency |               | Song Sparrow PC1 |                |
|----------------------------|----------------------------|---------------|------------------|----------------|
|                            | r                          | P             | r                | P              |
| <b>POA-hypothalamus:</b>   |                            |               |                  |                |
| POM                        | -0.468                     | 0.3494        | -0.358           | 0.4857         |
| PVN                        | -0.588                     | 0.2196        | -0.441           | 0.3811         |
| PVN cells per section/g bw | <b>-0.872</b>              | <b>0.0234</b> | -0.770           | 0.0732         |
| AH                         | -0.633                     | 0.1772        | -0.451           | 0.3698         |
| VMH, medial                | 0.087                      | 0.5715        | 0.265            | 0.6123         |
| VMH, lateral               | 0.280                      | 0.5905        | 0.157            | 0.7671         |
| <b>Septum:</b>             |                            |               |                  |                |
| LSc.d (pallial), rostral   | 0.495                      | 0.3182        | <b>0.888</b>     | <b>0.0182</b>  |
| subpallial LSc, rostral    | -0.176                     | 0.7381        | <b>0.884</b>     | <b>0.0193</b>  |
| LSr                        | 0.577                      | 0.2301        | <b>0.968</b>     | <b>0.0015*</b> |
| LSc.d (pallial), caudal    | <b>0.868</b>               | <b>0.0251</b> | -0.231           | 0.6590         |
| subpallial LSc, caudal     | <b>0.905</b>               | <b>0.0132</b> | -0.108           | 0.8385         |
| nPC                        | -0.395                     | 0.4389        | 0.405            | 0.3645         |
| CcS                        | -0.330                     | 0.5224        | -0.700           | 0.1216         |
| <b>Extended amygdala:</b>  |                            |               |                  |                |
| MeA, anterior              | 0.628                      | 0.1819        | 0.028            | 0.9578         |
| MeA, posterior             | 0.629                      | 0.1811        | 0.290            | 0.5775         |
| BSTm                       | 0.190                      | 0.7190        | -0.807           | 0.0523         |
| BSTL                       | 0.416                      | 0.4126        | 0.440            | 0.3825         |
| <b>Midbrain:</b>           |                            |               |                  |                |
| CG                         | 0.644                      | 0.1672        | 0.559            | 0.2485         |
| ICo                        | 0.811                      | 0.0501        | 0.784            | 0.0648         |
| VTA, rostral               | <b>-0.867</b>              | <b>0.0255</b> | -0.200           | 0.7042         |
| VTA, caudal                | -0.530                     | 0.2794        | -0.209           | 0.6915         |
| <b>Other:</b>              |                            |               |                  |                |
| nAcc                       | -0.279                     | 0.5919        | 0.010            | 0.9849         |

\*Regression significant following Benjamini-Hochberg corrections ( $\alpha = 0.0022$ ).

**Table S8.** Results of simple regressions between CRH immunolabeling and measures of aggression (as in Table S7).

| Area                       | Field Sparrow mean latency |               | Song Sparrow PC1 |               |
|----------------------------|----------------------------|---------------|------------------|---------------|
|                            | r                          | P             | r                | P             |
| <b>POA-hypothalamus:</b>   |                            |               |                  |               |
| POM                        | -0.215                     | 0.6824        | 0.497            | 0.3162        |
| PVN                        | -0.180                     | 0.7336        | 0.724            | 0.1038        |
| PVN cells per section/g bw | -0.745                     | 0.0890        | 0.143            | 0.7870        |
| AH                         | -0.527                     | 0.2830        | 0.052            | 0.9220        |
| VMH, medial                | -0.154                     | 0.7711        | 0.345            | 0.5026        |
| VMH, lateral               | -0.385                     | 0.4512        | 0.348            | 0.4986        |
| <b>Septum:</b>             |                            |               |                  |               |
| LSc.d (pallial), rostral   | -0.234                     | 0.6549        | <b>0.875</b>     | <b>0.0225</b> |
| subpallial LSc, rostral    | -0.704                     | 0.1187        | <b>0.911</b>     | <b>0.0115</b> |
| LSr                        | -0.193                     | 0.7140        | <b>0.936</b>     | <b>0.0060</b> |
| LSc.d (pallial), caudal    | 0.726                      | 0.1021        | -0.455           | 0.3650        |
| subpallial LSc, caudal     | 0.167                      | 0.7524        | -0.576           | 0.2317        |
| nPC                        | -0.425                     | 0.4004        | -0.365           | 0.4773        |
| CcS                        | -0.421                     | 0.4053        | -0.537           | 0.2720        |
| <b>Extended amygdala:</b>  |                            |               |                  |               |
| MeA, anterior              | -0.064                     | 0.9036        | -0.785           | 0.0646        |
| MeA, posterior             | -0.366                     | 0.4758        | <b>-0.916</b>    | <b>0.0103</b> |
| BSTm                       | -0.346                     | 0.5023        | -0.622           | 0.1877        |
| BSTL                       | -0.421                     | 0.4062        | -0.729           | 0.1004        |
| <b>Midbrain:</b>           |                            |               |                  |               |
| CG                         | -0.410                     | 0.4189        | -0.326           | 0.5279        |
| ICo                        | -0.065                     | 0.9031        | -0.309           | 0.5517        |
| VTA, rostral               | <b>-0.868</b>              | <b>0.0250</b> | -0.307           | 0.5538        |
| VTA, caudal                | -0.521                     | 0.2897        | -0.689           | 0.1297        |
| <b>Other:</b>              |                            |               |                  |               |
| nAcc                       | -0.810                     | 0.0507        | 0.021            | 0.9680        |

\*Regression significant following Benjamini-Hochberg corrections ( $\alpha = 0.0022$ ).

**Table S9.** Results of simple regressions between TH immunolabeling and measures of aggression (as in Table S7).

| Area                                         | Field Sparrow mean latency |               | Song Sparrow PC1 |               |
|----------------------------------------------|----------------------------|---------------|------------------|---------------|
|                                              | r                          | P             | r                | P             |
| <b>POA-hypothalamus:</b>                     |                            |               |                  |               |
| POM                                          | -0.046                     | 0.9411        | 0.189            | 0.7603        |
| PVN                                          | -0.764                     | 0.1326        | -0.735           | 0.1567        |
| A14 cells per section/g bw (SPa)             | -0.353                     | 0.5603        | -0.101           | 0.8715        |
| AH                                           | -0.833                     | 0.0797        | -0.739           | 0.1533        |
| VMH, medial                                  | -0.441                     | 0.4576        | <b>0.926</b>     | <b>0.0237</b> |
| VMH, lateral                                 | -0.451                     | 0.4459        | 0.733            | 0.1584        |
| TH A12 per section/g bw (ExM)                | -0.122                     | 0.8172        | 0.402            | 0.4295        |
| <b>Septum:</b>                               |                            |               |                  |               |
| LSc.d (pallial), rostral                     | 0.876                      | 0.0517        | 0.764            | 0.1323        |
| subpallial LSc, rostral                      | 0.463                      | 0.4328        | -0.067           | 0.9154        |
| LSr                                          | <b>0.952</b>               | <b>0.0126</b> | -0.309           | 0.6135        |
| LSc.d (pallial), caudal                      | 0.769                      | 0.1286        | -0.415           | 0.4872        |
| subpallial LSc, caudal                       | 0.106                      | 0.8651        | 0.828            | 0.0834        |
| nPC                                          | 0.305                      | 0.6182        | 0.566            | 0.3198        |
| CcS                                          | 0.384                      | 0.5228        | 0.598            | 0.2872        |
| <b>Extended amygdala:</b>                    |                            |               |                  |               |
| MeA, anterior                                | 0.255                      | 0.6791        | 0.568            | 0.3182        |
| MeA, posterior                               | -0.019                     | 0.9752        | -0.305           | 0.6176        |
| BSTm                                         | -0.616                     | 0.2681        | 0.706            | 0.1827        |
| BSTL                                         | -0.533                     | 0.3550        | 0.329            | 0.5884        |
| <b>Midbrain:</b>                             |                            |               |                  |               |
| CG                                           | -0.372                     | 0.5372        | 0.419            | 0.4824        |
| A11 cells per section/g bw (CG)              | -0.302                     | 0.6218        | 0.443            | 0.4554        |
| ICo                                          | 0.676                      | 0.2100        | 0.157            | 0.8009        |
| VTA, rostral                                 | -0.499                     | 0.3924        | -0.419           | 0.4828        |
| A10r cells/100 $\mu\text{m}^2$ (rostral VTA) | 0.019                      | 0.9754        | 0.662            | 0.2237        |
| VTA, caudal                                  | 0.161                      | 0.7963        | -0.420           | 0.4814        |
| A10c cells/100 $\mu\text{m}^2$ (caudal VTA)  | -0.541                     | 0.3460        | 0.716            | 0.1739        |
| <b>Other:</b>                                |                            |               |                  |               |
| nAcc                                         | 0.361                      | 0.5504        | -0.194           | 0.7551        |

\*Regression significant following Benjamini-Hochberg corrections ( $\alpha = 0.0027$ ).

**Table S10.** Results of simple regressions between VT immunolabeling and measures of aggression (as in Table S7).

| Area                       | Field Sparrow mean latency |        | Song Sparrow PC1 |               |
|----------------------------|----------------------------|--------|------------------|---------------|
|                            | r                          | P      | r                | P             |
| <b>POA-hypothalamus:</b>   |                            |        |                  |               |
| POM                        | 0.520                      | 0.2905 | 0.463            | 0.3552        |
| PVN                        | -0.629                     | 0.1811 | 0.726            | 0.1021        |
| PVN cells per section/g bw | -0.579                     | 0.2283 | -0.208           | 0.6932        |
| AH                         | 0.774                      | 0.0705 | 0.250            | 0.6332        |
| VMH, medial                | -0.665                     | 0.1497 | 0.395            | 0.4380        |
| VMH, lateral               | -0.196                     | 0.7104 | 0.165            | 0.7546        |
| <b>Septum:</b>             |                            |        |                  |               |
| LSc.d (pallial), rostral   | 0.263                      | 0.6147 | 0.404            | 0.4273        |
| subpallial LSc, rostral    | 0.037                      | 0.9446 | <b>0.843</b>     | <b>0.0350</b> |
| LSr                        | 0.485                      | 0.3296 | 0.589            | 0.2182        |
| LSc.d (pallial), caudal    | -0.629                     | 0.2559 | 0.029            | 0.9565        |
| subpallial LSc, caudal     | -0.537                     | 0.3510 | 0.608            | 0.2003        |
| nPC                        | -0.504                     | 0.3080 | 0.154            | 0.7704        |
| CcS                        | -0.085                     | 0.8731 | 0.741            | 0.0918        |
| <b>Extended amygdala:</b>  |                            |        |                  |               |
| MeA, anterior              | -0.260                     | 0.6184 | 0.510            | 0.3016        |
| MeA, posterior             | -0.265                     | 0.6124 | -0.434           | 0.3894        |
| BSTm                       | -0.632                     | 0.1792 | 0.612            | 0.1965        |
| BSTL                       | 0.119                      | 0.8227 | 0.624            | 0.1851        |
| <b>Midbrain:</b>           |                            |        |                  |               |
| CG                         | -0.279                     | 0.5924 | 0.693            | 0.1268        |
| ICo                        | -0.265                     | 0.6121 | 0.280            | 0.5909        |
| VTA, rostral               | -0.218                     | 0.6778 | 0.097            | 0.8552        |
| VTA, caudal                | -0.676                     | 0.1407 | -0.316           | 0.5420        |
| <b>Other:</b>              |                            |        |                  |               |
| nAcc                       | -0.542                     | 0.2668 | 0.197            | 0.7090        |

\*Regression significant following Benjamini-Hochberg corrections ( $\alpha = 0.0025$ ).

**Table S11.** Results of simple regressions between VIP immunolabeling and measures of aggression (as in Table S7).

| Area                                                | Field Sparrow<br>mean latency |               | Song Sparrow<br>PC1 |               |
|-----------------------------------------------------|-------------------------------|---------------|---------------------|---------------|
|                                                     | <i>r</i>                      | <i>P</i>      | <i>r</i>            | <i>P</i>      |
| <b><i>POA-hypothalamus:</i></b>                     |                               |               |                     |               |
| POM                                                 | -0.020                        | 0.9700        | -0.549              | 0.2587        |
| PVN                                                 | -0.165                        | 0.7554        | -0.458              | 0.3607        |
| AH                                                  | 0.185                         | 0.7263        | <b>-0.860</b>       | <b>0.0281</b> |
| VMH, medial                                         | -0.275                        | 0.5984        | 0.412               | 0.4171        |
| VMH, lateral                                        | -0.304                        | 0.5580        | 0.463               | 0.3550        |
| Tuberal cells per section/g bw<br>(periventricular) | 0.480                         | 0.3349        | 0.584               | 0.3016        |
| <b><i>Septum:</i></b>                               |                               |               |                     |               |
| LSc.d (pallial), rostral                            | 0.314                         | 0.5439        | 0.152               | 0.7532        |
| subpallial LSc, rostral                             | 0.028                         | 0.9579        | -0.091              | 0.8645        |
| LSr                                                 | 0.548                         | 0.2607        | 0.273               | 0.6014        |
| LSc.d (pallial), caudal                             | 0.501                         | 0.3111        | -0.218              | 0.6789        |
| subpallial LSc, caudal                              | -0.085                        | 0.8726        | -0.350              | 0.4964        |
| nPC                                                 | -0.050                        | 0.9255        | -0.065              | 0.9029        |
| CcS                                                 | -0.360                        | 0.4827        | -0.370              | 0.4704        |
| <b><i>Extended amygdala:</i></b>                    |                               |               |                     |               |
| MeA, anterior                                       | 0.048                         | 0.9279        | 0.742               | 0.0915        |
| MeA, posterior                                      | 0.426                         | 0.3994        | -0.039              | 0.9420        |
| BSTm                                                | <b>-0.872</b>                 | <b>0.0234</b> | -0.604              | 0.2046        |
| BSTL                                                | 0.398                         | 0.4348        | 0.403               | 0.4284        |
| <b><i>Midbrain:</i></b>                             |                               |               |                     |               |
| CG                                                  | 0.507                         | 0.3043        | 0.041               | 0.9384        |
| ICo                                                 | -0.287                        | 0.5818        | -0.137              | 0.7954        |
| VTA, rostral                                        | -0.272                        | 0.6023        | 0.120               | 0.8209        |
| VTA, caudal                                         | -0.562                        | 0.2454        | -0.123              | 0.8163        |
| <b><i>Other:</i></b>                                |                               |               |                     |               |
| nAcc                                                | <b>-0.891</b>                 | <b>0.0171</b> | -0.635              | 0.1759        |

\*Regression significant following Benjamini-Hochberg corrections ( $\alpha = 0.0022$ ).

**Table S12.** Results of simple regressions between ARO immunolabeling and measures of aggression (as in Table S7).

| Area                             | Field Sparrow<br>mean latency |          | Song Sparrow<br>PC1 |               |
|----------------------------------|-------------------------------|----------|---------------------|---------------|
|                                  | <i>r</i>                      | <i>P</i> | <i>r</i>            | <i>P</i>      |
| <b><i>POA-hypothalamus:</i></b>  |                               |          |                     |               |
| VMH, lateral                     | 0.428                         | 0.3967   | -0.147              | 0.7809        |
| <b><i>Septum:</i></b>            |                               |          |                     |               |
| nPC                              | -0.541                        | 0.2681   | -0.118              | 0.8242        |
| CcS                              | 0.                            | 0.       | 0.                  | 0.            |
| <b><i>Extended amygdala:</i></b> |                               |          |                     |               |
| MeA, anterior                    | -0.261                        | 0.6177   | <b>-0.905</b>       | <b>0.0132</b> |
| MeA, posterior                   | 0.514                         | 0.2968   | <b>-0.835</b>       | <b>0.0386</b> |
| BSTm                             | -0.359                        | 0.4851   | <b>-0.836</b>       | <b>0.0381</b> |

\*Regression significant following Benjamini-Hochberg corrections ( $\alpha = 0.0100$ ).

**Table S13.** Results of simple regressions between immunolabeling and aggression PC1 from a combined analysis of field and song sparrows (Fig. 6). PC1 is negatively related to aggression. Unless otherwise noted (for cell counts), data are shown as optical density measures, corrected for background.

| Area                                           | VIP           |                | VT           |                | TH           |                | ARO           |                | CRH           |               | MT            |               |
|------------------------------------------------|---------------|----------------|--------------|----------------|--------------|----------------|---------------|----------------|---------------|---------------|---------------|---------------|
|                                                | r             | P              | r            | P              | r            | P              | r             | P              | r             | P             | r             | P             |
| <b>POA-hypothalamus:</b>                       |               |                |              |                |              |                |               |                |               |               |               |               |
| POM                                            | -0.395        | 0.2298         | 0.311        | 0.3520         | <b>0.702</b> | <b>0.0349</b>  | -             | -              | 0.492         | 0.1245        | 0.031         | 0.9284        |
| PVN                                            | -0.566        | 0.0698         | -0.060       | 0.8615         | 0.504        | 0.1663         | -             | -              | 0.272         | 0.4182        | -0.061        | 0.8588        |
| AH                                             | <b>-0.812</b> | <b>0.0024*</b> | 0.054        | 0.8749         | <b>0.812</b> | <b>0.0078*</b> | -             | -              | 0.523         | 0.0986        | 0.288         | 0.3911        |
| VMH, medial                                    | <b>0.689</b>  | <b>0.0191</b>  | 0.531        | 0.0930         | 0.370        | 0.3274         | -             | -              | 0.427         | 0.1900        | 0.396         | 0.2027        |
| VMH, lateral                                   | <b>0.872</b>  | <b>0.0005*</b> | 0.578        | 0.0628         | 0.321        | 0.3998         | -0.162        | 0.6342         | 0.311         | 0.3521        | 0.408         | 0.1876        |
| <b>Septum:</b>                                 |               |                |              |                |              |                |               |                |               |               |               |               |
| LSc.d (pallial), rostral                       | 0.163         | 0.6324         | -            | -              | 0.657        | 0.0546         | -             | -              | -0.147        | 0.6652        | 0.126         | 0.7118        |
| subpallial LSc, rostral                        | -0.380        | 0.2490         | -0.284       | 0.3967         | 0.416        | 0.2656         | -             | -              | 0.189         | 0.5783        | 0.101         | 0.7676        |
| LSr                                            | 0.013         | 0.9702         | -            | -              | <b>0.680</b> | <b>0.0440</b>  | -             | -              | -0.096        | 0.7795        | 0.078         | 0.8186        |
| LSc.d (pallial), caudal                        | -0.413        | 0.2065         | -0.268       | 0.4264         | -0.291       | 0.4473         | -             | -              | -0.247        | 0.4640        | -0.463        | 0.1511        |
| subpallial LSc, caudal                         | 0.350         | 0.2906         | -0.432       | 0.1845         | 0.542        | 0.1314         | -             | -              | 0.144         | 0.6727        | <b>-0.625</b> | <b>0.0399</b> |
| nPC                                            | 0.013         | 0.9694         | 0.297        | 0.3759         | -0.335       | 0.3776         | 0.291         | 0.3853         | 0.355         | 0.2837        | 0.338         | 0.3099        |
| CcS                                            | <b>-0.655</b> | <b>0.0286</b>  | 0.117        | 0.6026         | -0.163       | 0.6747         | -             | -              | <b>0.806</b>  | <b>0.0027</b> | 0.126         | 0.7128        |
| <b>Extended amygdala:</b>                      |               |                |              |                |              |                |               |                |               |               |               |               |
| MeA, anterior                                  | -0.534        | 0.0909         | -0.138       | 0.6856         | 0.158        | 0.6840         | -0.593        | 0.0544         | -0.065        | 0.8501        | -0.085        | 0.8046        |
| MeA, posterior                                 | -0.083        | 0.8082         | 0.056        | 0.8698         | 0.143        | 0.7135         | <b>-0.801</b> | <b>0.0030*</b> | <b>-0.681</b> | <b>0.0212</b> | -0.136        | 0.6897        |
| BSTm                                           | -0.130        | 0.7023         | <b>0.871</b> | <b>0.0005*</b> | 0.227        | 0.5573         | 0.383         | 0.2454         | 0.371         | 0.2613        | 0.242         | 0.4730        |
| BSTL                                           | -0.056        | 0.8690         | -0.273       | 0.4165         | -0.265       | 0.4903         | -             | -              | -0.546        | 0.0824        | 0.144         | 0.6727        |
| <b>Midbrain:</b>                               |               |                |              |                |              |                |               |                |               |               |               |               |
| CG                                             | 0.460         | 0.1548         | <b>0.774</b> | <b>0.0052</b>  | 0.647        | 0.0596         | -             | -              | 0.331         | 0.3201        | 0.540         | 0.0861        |
| ICo                                            | 0.531         | 0.0926         | <b>0.614</b> | <b>0.0446</b>  | <b>0.898</b> | <b>0.0010*</b> | -             | -              | 0.170         | 0.6171        | 0.204         | 0.5466        |
| VTA, rostral                                   | 0.107         | 0.7534         | 0.123        | 0.7190         | 0.343        | 0.3667         | -             | -              | -0.196        | 0.5631        | -0.130        | 0.7026        |
| VTA, caudal                                    | -0.444        | 0.1708         | 0.065        | 0.8490         | 0.651        | 0.0577         | -             | -              | -0.119        | 0.7269        | 0.367         | 0.2673        |
| <b>Other:</b>                                  |               |                |              |                |              |                |               |                |               |               |               |               |
| nAcc                                           | -0.399        | 0.2237         | <b>0.619</b> | <b>0.0424</b>  | -0.034       | 0.9300         | -             | -              | <b>-0.739</b> | <b>0.0094</b> | -0.312        | 0.3504        |
| <b>Cell group:</b>                             |               |                |              |                |              |                |               |                |               |               |               |               |
| VIP tuberal per section/g bw (periventricular) | -0.260        | 0.4688         | -            | -              | -            | -              | -             | -              | -             | -             | -             | -             |
| VT PVN per section/g bw                        | -             | -              | 0.171        | 0.6162         | -            | -              | -             | -              | -             | -             | -             | -             |
| MT PVN per section/g bw                        | -             | -              | -            | -              | -            | -              | -             | -              | -             | -             | 0.471         | 0.1440        |
| CRH PVN per section/g bw                       | -             | -              | -            | -              | -            | -              | -             | -              | -0.061        | 0.8580        | -             | -             |
| TH A10r/100 $\mu\text{m}^2$ (rostral VTA)      | -             | -              | -            | -              | <b>0.866</b> | <b>0.0025*</b> | -             | -              | -             | -             | -             | -             |
| TH A10c/100 $\mu\text{m}^2$ (caudal VTA)       | -             | -              | -            | -              | 0.651        | 0.0575         | -             | -              | -             | -             | -             | -             |
| TH A11 per section/g bw (CG)                   | -             | -              | -            | -              | 0.022        | 0.9551         | -             | -              | -             | -             | -             | -             |
| TH A12 per section/g bw (ExM)                  | -             | -              | -            | -              | <b>0.620</b> | <b>0.0420</b>  | -             | -              | -             | -             | -             | -             |
| TH A14 per section/g bw (SPa)                  | -             | -              | -            | -              | <b>0.866</b> | <b>0.0025*</b> | -             | -              | -             | -             | -             | -             |

\*Regressions marked with an asterisk are significant following Benjamini-Hochberg corrections ( $\alpha = \text{VIP} = 0.0045$ ; for VT = 0.0055; for TH = 0.0076; for ARO = 0.0100; for MT = 0.0022).

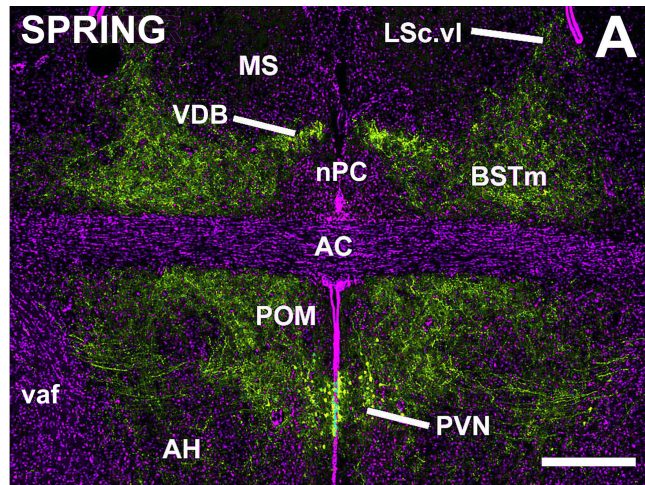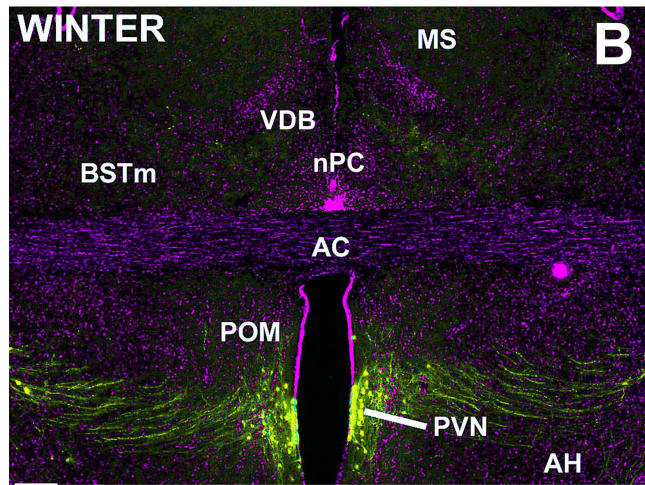

C

Species:  $P = 0.0064^*$   
 Season:  $P = <0.0001^*$   
 Species\*Season:  $P = 0.0131^*$

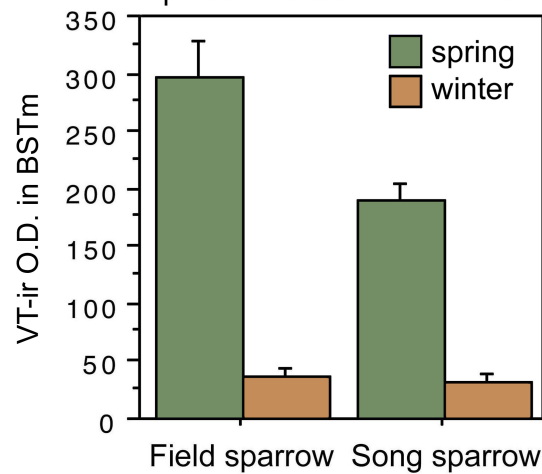

**Fig. S1.** (A-B) Seasonal variation in the VT innervation of the BSTm, vertical limb of the diagonal band (VDB), medial preoptic nucleus (POM) and hypothalamic areas of field sparrows. VT and DAPI are pseudocolored green and purple, respectively. Scale bar = 250  $\mu$ m. (C) Optical density (O.D., in arbitrary units; corrected for background) of VT immunolabeling in the BSTm. Other abbreviations: AC, anterior commissure; AH, anterior hypothalamus; MS, medial septum; nPC, nucleus of the pallial commissure; PVN, paraventricular nucleus; vaf, ventral amygdalofugal tract.

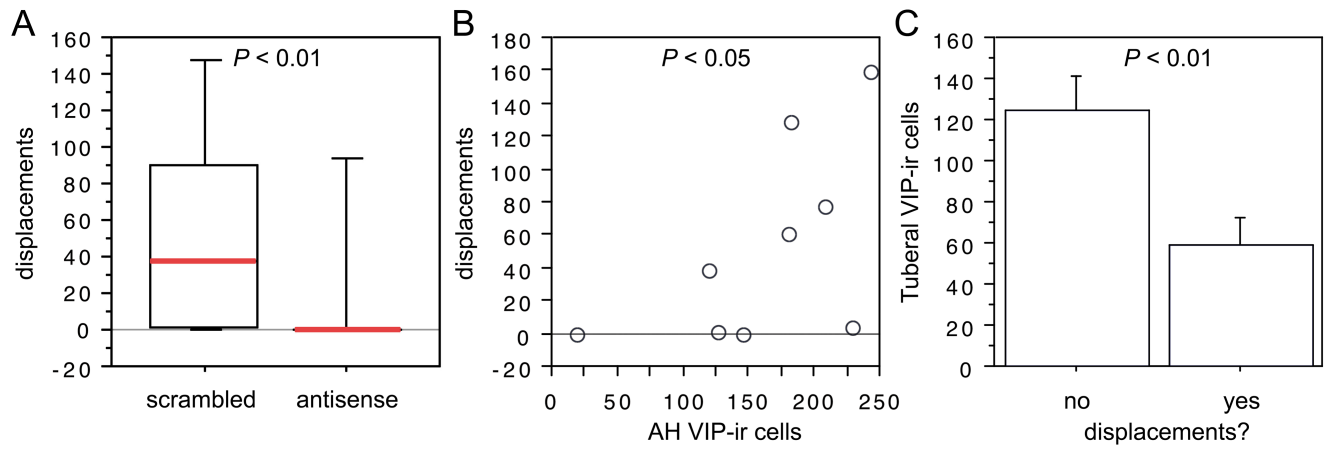

**Fig. S2.** (A) Antisense knockdown of VIP production in the AH of territorial violet-eared waxbills (*Uraeginthus granatina*) reduces aggression relative to subjects infused with scrambled oligonucleotides as a control. Resident-intruder tests were 3 min. There were no sex differences and sexes are shown pooled ( $n = 9$  birds per treatment; data analyzed by Mann-Whitney). (B) A Spearman rank correlation of displacements and VIP-ir cell number in the AH (3 sections summed) of control subjects. (C) Although the number of VIP-ir neurons in the tuberal hypothalamus (2 sections summed) does not correlate with aggression, less aggressive subjects have significantly more neurons than do subjects that exhibit displacements during the 3 min test (analyzed by unpaired  $t$ -test). Data are as presented at the annual meeting of the Society for Behavioral Neuroendocrinology, Queretaro, Mexico, June 23-26, 2011.
